# Supplementary material for: Wildfire plume ageing in the Photochemical Large Aerosol Chamber (PHOTO-LAC)
Source: Royal Society of Chemistry journal article supplement (doi:10.1039/d3em00280b), 2023-10-24
Supplement: d3em00280b1.pdf [file d3em00280b1.pdf]

*Supplement of*

**Wildfire plume ageing in the Photochemical Large Aerosol Chamber (PHOTO-LAC)**

*Hendryk Czech<sup>1,\*</sup>, Olga Popovicheva<sup>2,\*</sup>, Dmitriy G. Chernov<sup>3</sup>, Alexander Kozlov<sup>4</sup>, Eric Schneider<sup>1,5</sup>, Vladimir P. Shmargunov<sup>3</sup>, Maxime Sueur<sup>6,7</sup>, Christopher P. Rüger<sup>1,5</sup>, Carlos Afonso<sup>6,7</sup>, Viktor Uzhegov<sup>3</sup>, Valerii S. Kozlov<sup>3</sup>, Mikhail V. Panchenko<sup>3</sup>, Ralf Zimmermann<sup>1,5</sup>*

<sup>1</sup>Joint Mass Spectrometry Centre (JMSC), Department of Analytical and Technical Chemistry, Chair of Analytical Chemistry, University of Rostock, 18059, Rostock, Germany

<sup>2</sup>Skobeltsyn Institute of Nuclear Physics, Lomonosov Moscow State University, 119991, Moscow, Russia

<sup>3</sup>V. E. Zuev Institute of Atmospheric Optics, Siberian Branch of the Russian Academy of Sciences, 634055, Tomsk, Russia

<sup>4</sup>Voevodsky Institute of Chemical Kinetics and Combustion, Siberian Branch of the Russian Academy of Sciences, 630090, Novosibirsk, Russia

<sup>5</sup>Department Life, Light & Matter (LLM), University of Rostock, 18059, Rostock, Germany

<sup>6</sup>Normandie Université, UNIROUEN, INSA Rouen, CNRS, COBRA, 76000, Rouen, France

<sup>7</sup>International Joint Laboratory – iC2MC: Complex Matrices Molecular Characterization, 76700, Harfleur, France

\*corresponding authors: hendryk.czech@uni-rostock.de; olga.popovicheva@gmail.com

**Table of Content**

|          |                                                                                              |
|----------|----------------------------------------------------------------------------------------------|
| Table S1 | Uncertainty of repeated APPI FT-ICR MS measurement                                           |
| Fig. S1  | Spatial homogeneity of temperature and relative humidity in PHOTO-LAC                        |
| Fig. S2  | Coagulation and wall losses of particles for individual sizes                                |
| Fig. S3  | Size distribution of fresh BB aerosol (flaming/smouldering)                                  |
| Fig. S4  | ePM and $b_{\text{abs}}$ of flaming and smouldering BB aerosol during residence in PHOTO-LAC |
| Fig. S5  | Wall loss of toluene                                                                         |
| Fig. S6  | Collision-induced dissociation (CID) of $m/z$ 154 ( $\text{C}_6\text{H}_4\text{NO}_4^-$ )    |
| Fig. S7  | Evolution of ePM, NO, NO <sub>2</sub> and O <sub>3</sub> during dark ageing                  |
| Fig. S8  | Venn diagrams of APPI high resolution mass spectra from long ageing experiments              |

Table S1 Repeated analysis of photochemically-aged BB aerosol (from BB6) with average and 95% confidence interval for the number of assigned sum formula, the modified aromaticity index ( $AI_{mod}$ ), organic matter to organic carbon ratio (OM:OC) and elemental ratios H:C and O:C

|           | sum formula number | $AI_{mod}$ | OM:OC | H:C  | O:C  |
|-----------|--------------------|------------|-------|------|------|
| Analysis1 | 4314               | 0.37       | 2.44  | 1.31 | 0.15 |
| Analysis2 | 4126               | 0.37       | 2.44  | 1.31 | 0.16 |
| Analysis3 | 3368               | 0.38       | 2.43  | 1.29 | 0.17 |
| Average   | 3936               | 0.38       | 2.44  | 1.30 | 0.16 |
| 95% CI    | 982                | 0.01       | 0.01  | 0.02 | 0.01 |

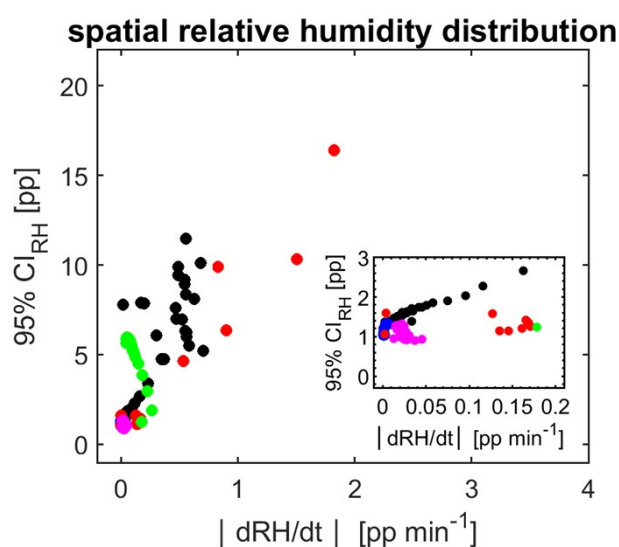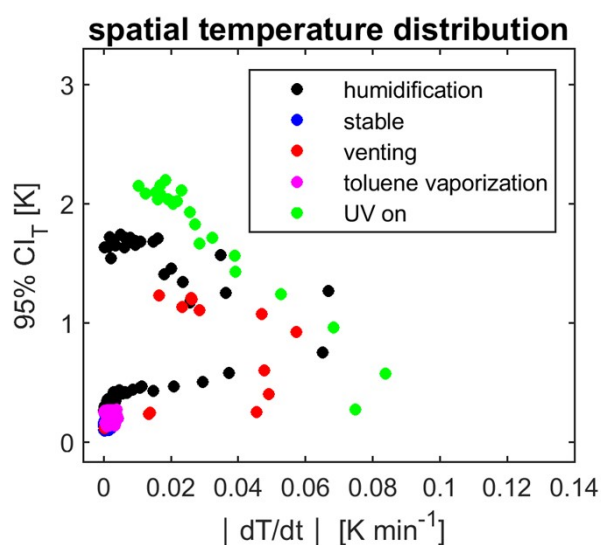

Fig. S1 95% Confidence interval (95% CI) of relative humidity (RH) and temperature (T) from twelve RH and T sensor measurements in PHOTO-LAC dependent on change over time for various operation conditions.

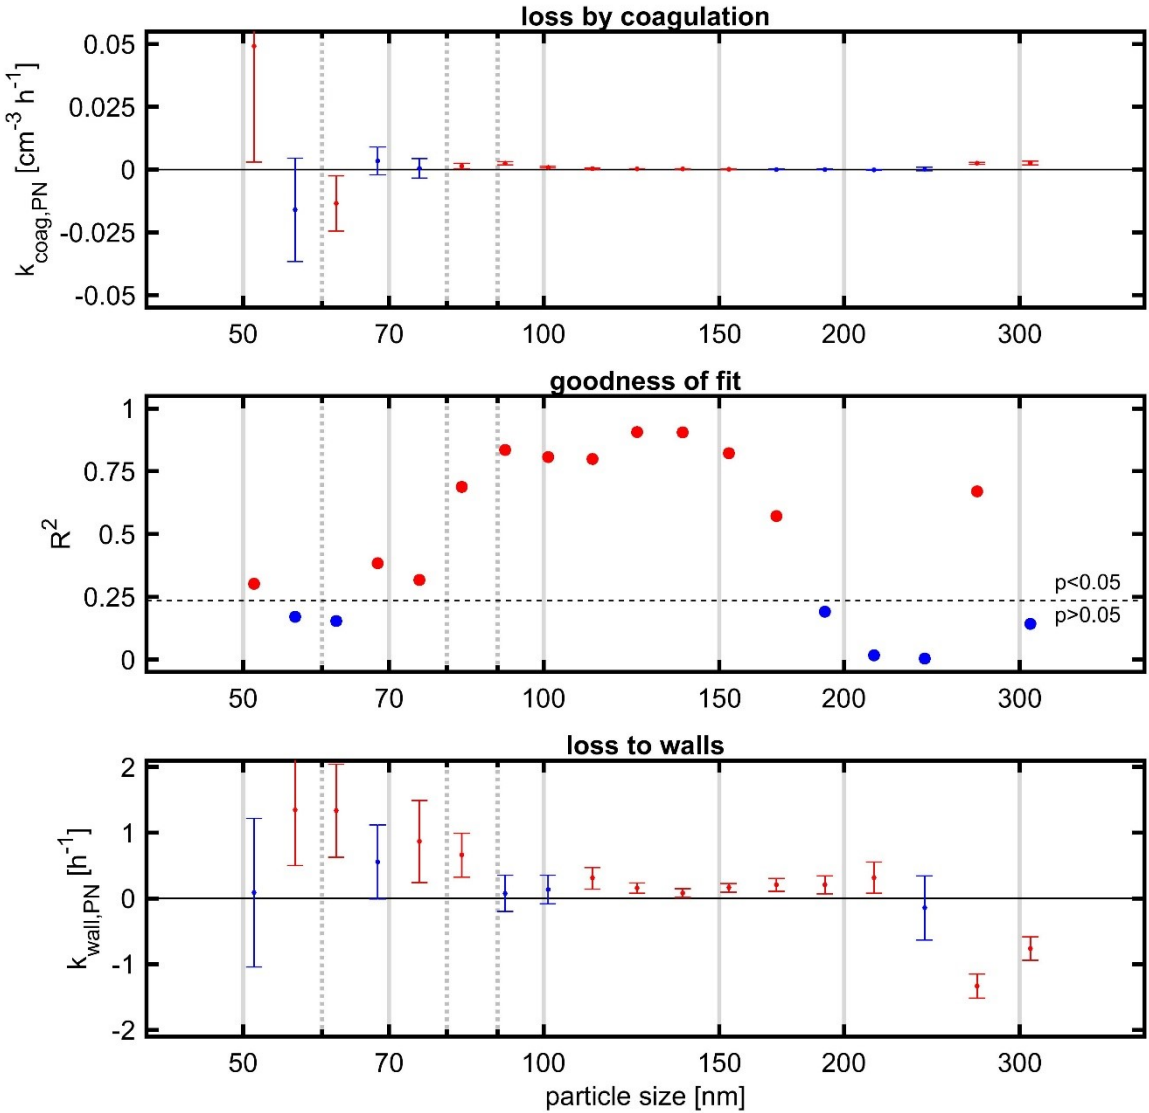

**Fig. S2.** Loss rate individual particle sizes due to coagulation or loss to the inner walls according to equation  $dPN/dt = -k_{coag,PN} \cdot N^2 - k_{wall,PN} \cdot N$  with goodness of fit represented by explained variance  $R^2$  between measured and fitted data. Red colour indicates statistically significant difference from zero at 5% level.

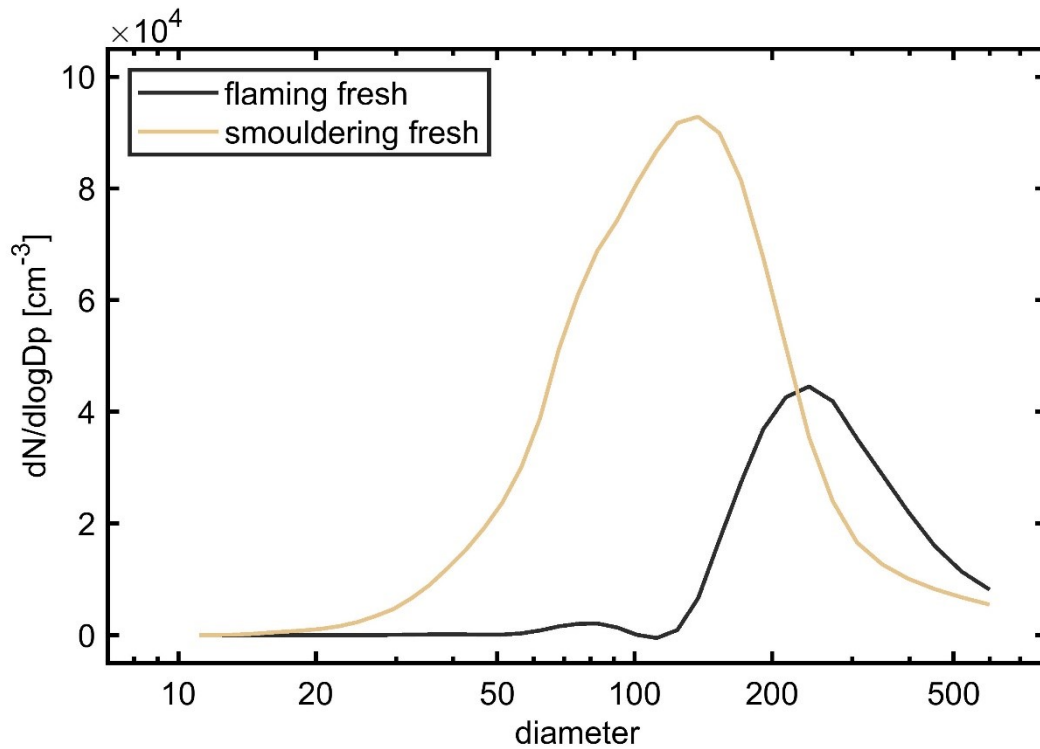

Fig.S3 Size distributions of fresh flaming and smouldering BB aerosol from experiments BB1 and BB6 referring to Table 1 of the main manuscript.

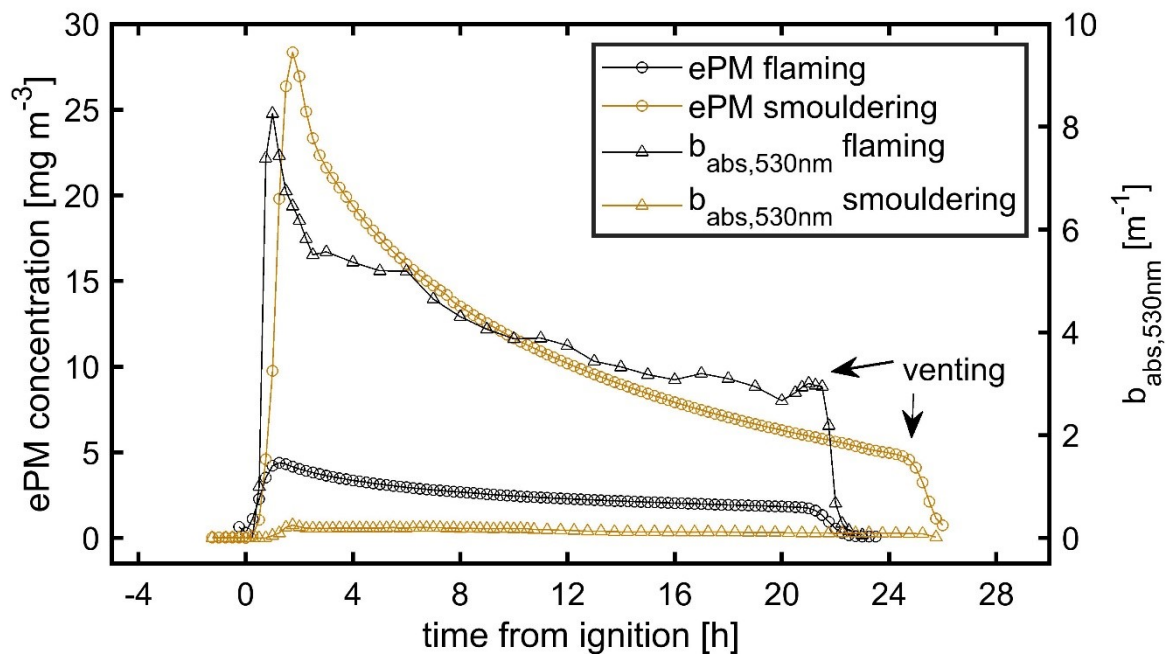

Fig. S4. ePM and  $b_{\text{abs}}$  from BB under flaming (black) and smouldering (brown) conditions derived from nephelometer (circles) and aethalometer at 530 nm (triangles). Declining concentrations of flaming aerosol after 22 h and smouldering aerosol after 25 h results from PHOTO-LAC venting.

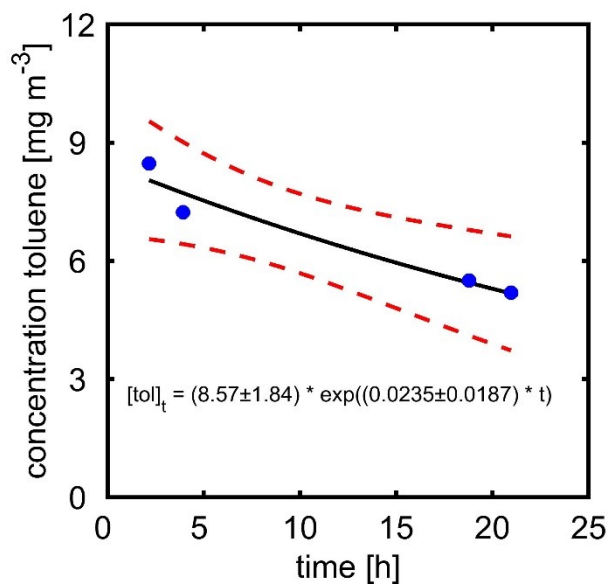

Fig. S5. Toluene loss over time with 95% non-simultaneous functional confidence band.

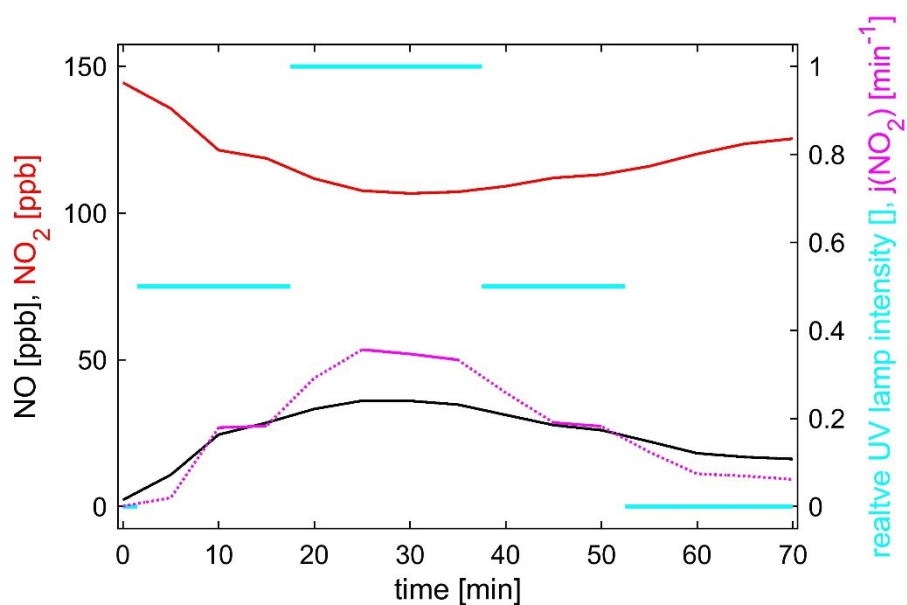

Fig. S6. Temporal concentrations of NO and NO<sub>2</sub> at 50% and 100% UV light intensity. The final photolysis rate  $j(\text{NO}_2)$  was obtained from periods indicated by solid lines.

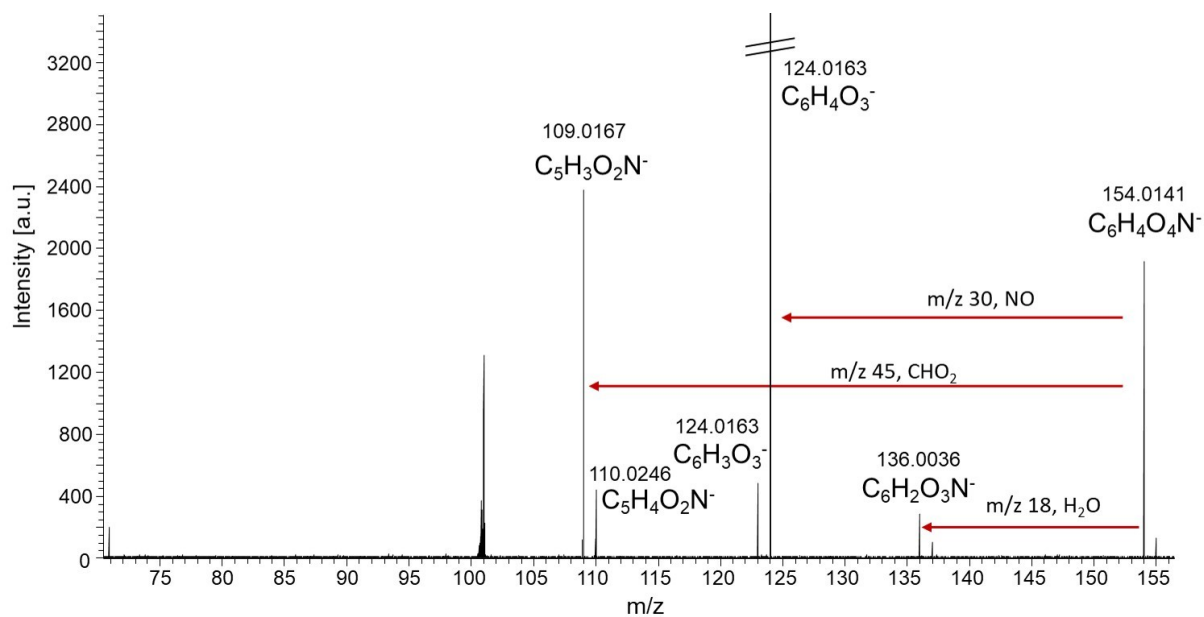

Fig. S7. Collision-induced dissociation (CID) of  $m/z$  154 in aerosol from toluene photooxidation (tol4). The most intense fragment was observed at  $m/z$  124.016 corresponds to NO neutral loss, indicating the presence of 4-nitro-catechol. The signal at  $m/z$  101 belong to electronic noise.

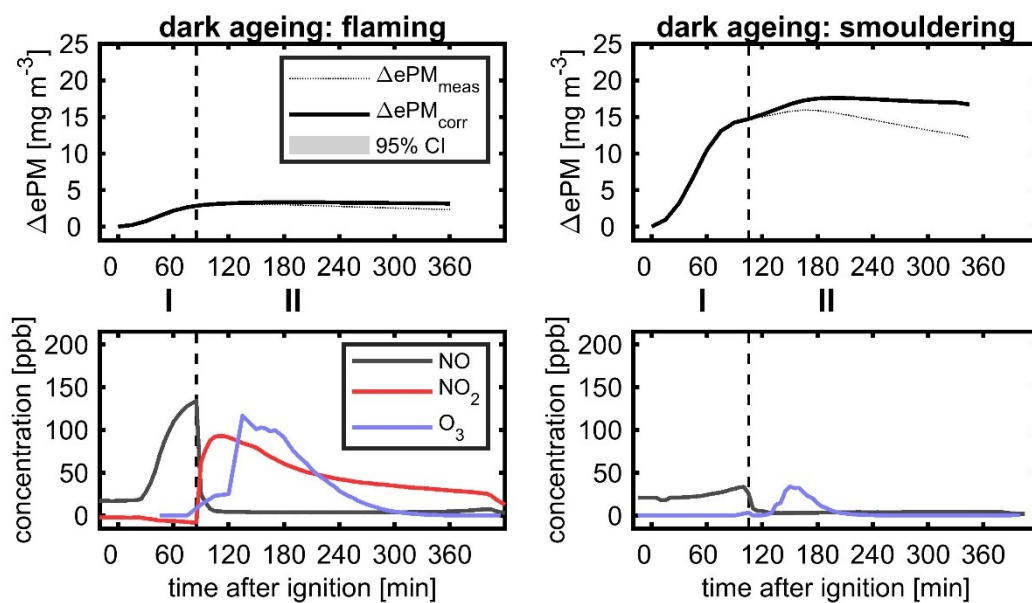

Fig. S8 short dark ageing of flaming (left) smouldering BB aerosol (right) with temporal evolution of equivalent particle mass (ePM; top) and gases NO, NO<sub>2</sub> and O<sub>3</sub> (bottom) for (I) generation of BB aerosol and (II) ozone addition. In order to facilitate formation of  $\cdot\text{NO}_3$ , after conversion of NO to NO<sub>2</sub> the same amount of O<sub>3</sub> is added 30 min later. For smouldering condition, no NO<sub>2</sub> data is available.

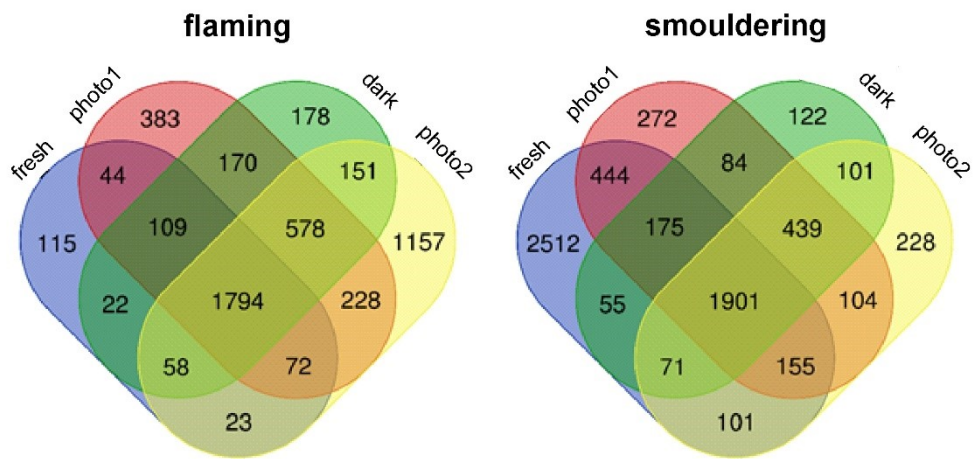

Fig. S9. Venn diagrams of APPI high resolution mass spectra from long ageing with alternating photochemical (photo1 and photo 2) and dark ageing (dark) conditions.
